# Supplementary material for: Brain endothelial cells promote breast cancer cell extravasation to the brain via EGFR-DOCK4-RAC1 signalling
Source: PubMed Central journal article supplement (PMC11102446; doi:10.1038/s42003-024-06200-x), 2024-05-18
Supplement: 42003_2024_6200_MOESM1_ESM.pdf [file 42003_2024_6200_MOESM1_ESM.pdf]

## Description of Additional Supplementary Files

**File Name:** Supplementary Data 1

**Description:** The source data behind the graphs in the paper.

**File name:** Supplementary Movie 1

**Description:** Representative example of real-time assessment of MDA-MB-231/Brain cell confluency upon stable DOCK4 depletion.

**File name:** Supplementary Movie 2

**Description:** Representative example of intercalation assays of MDA-MB-231/Brain cells upon stable DOCK4 depletion.
