# Supplementary material for: Brain endothelial cells promote breast cancer cell extravasation to the brain via EGFR-DOCK4-RAC1 signalling
Source: PubMed Central journal article supplement (PMC11102446; doi:10.1038/s42003-024-06200-x), 2024-05-18
Supplement: 42003_2024_6200_MOESM6_ESM.pdf [file 42003_2024_6200_MOESM6_ESM.pdf]

1 **Supplementary information**

2  
3 **Supplementary Figure 1.** Uncropped western blots. Yellow marking denotes the re-probed area for  
4 GAPDH.

5  
6 **Fig. 1a**  
7 DOCK4 (lanes 2-4)

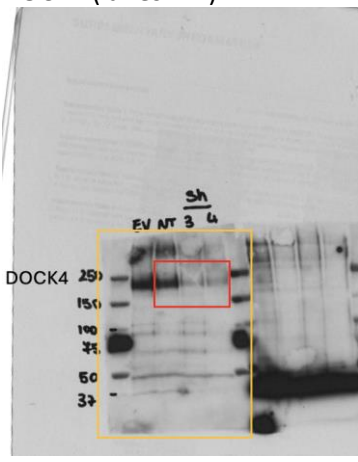

8  
9  
10 **GAPDH**

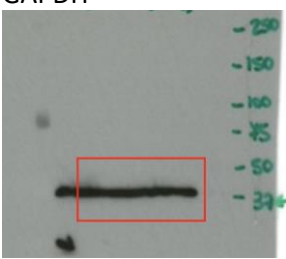

11  
12  
13 **Fig. 2f**  
14 **Rac1 (lanes 1-3)**

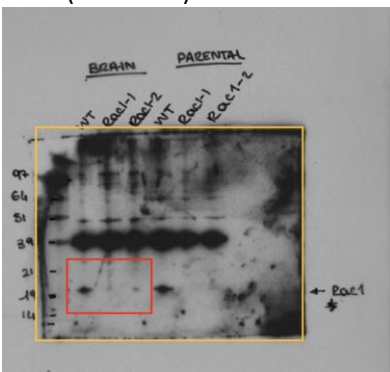

15  
16  
17 **GAPDH**

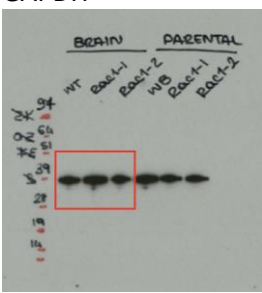

18

19 **Fig. 4a**

20

21 pEGFR (lanes 1,2,3,4,5,6,9,10)

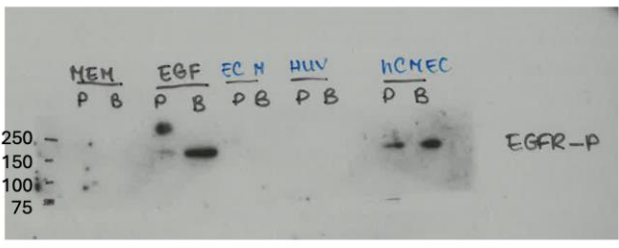

22

23

24 GAPDH (pEGFR)

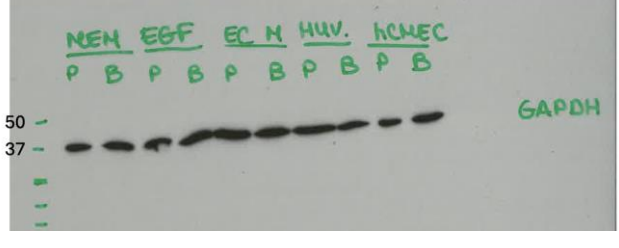

25

26

27 EGFR (lanes 1,2,3,4,5,6,9,10)

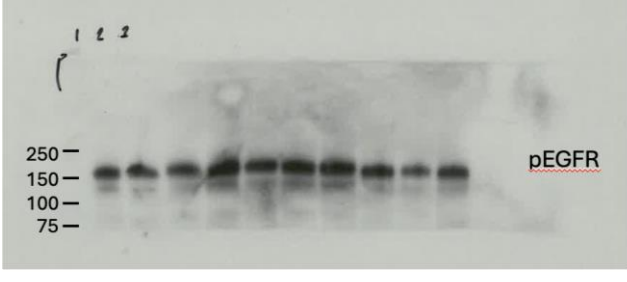

28

29

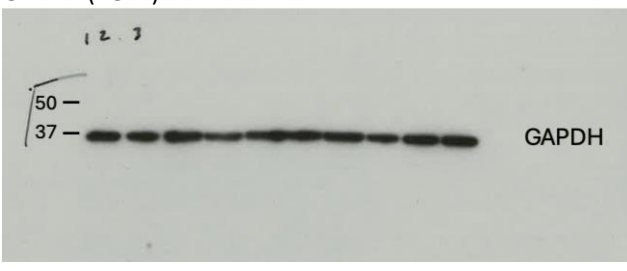

30

31

32

33

34

35

36

37

38

39

40

41

42

43

44

45 **Fig. 4c**

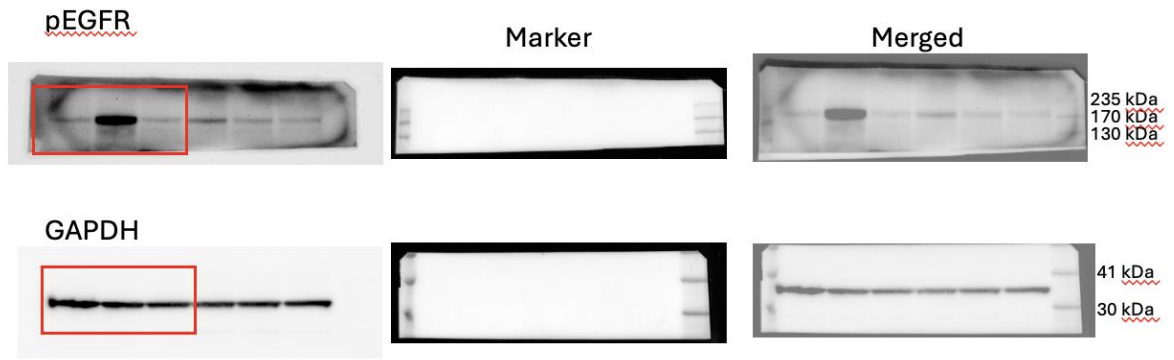

46  
47  
48  
49

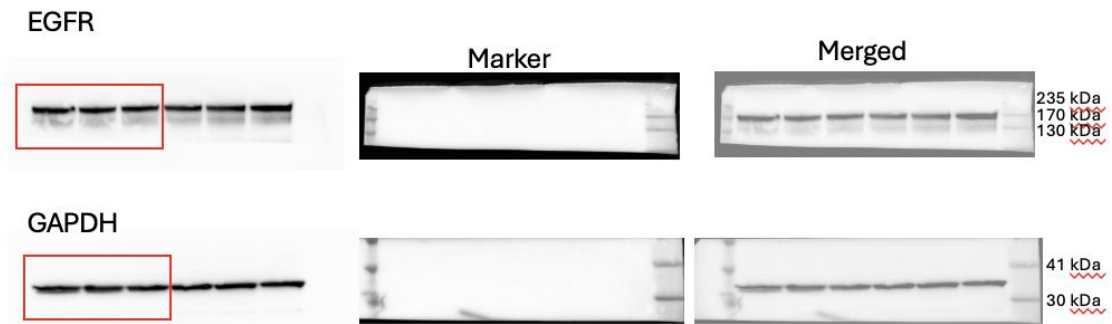

50  
51  
52  
53

**Fig. 5b**  
DOCK9

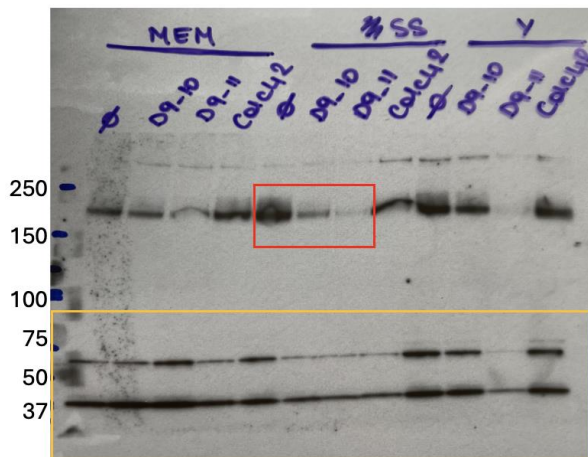

54  
55

GAPDH

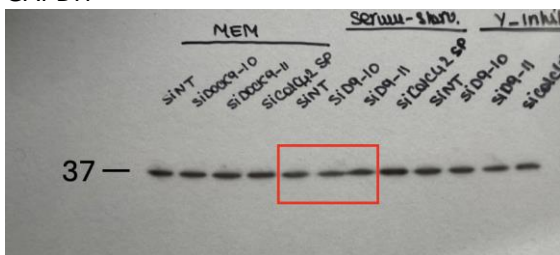

56

57 Fig. 5c  
58 CDC42

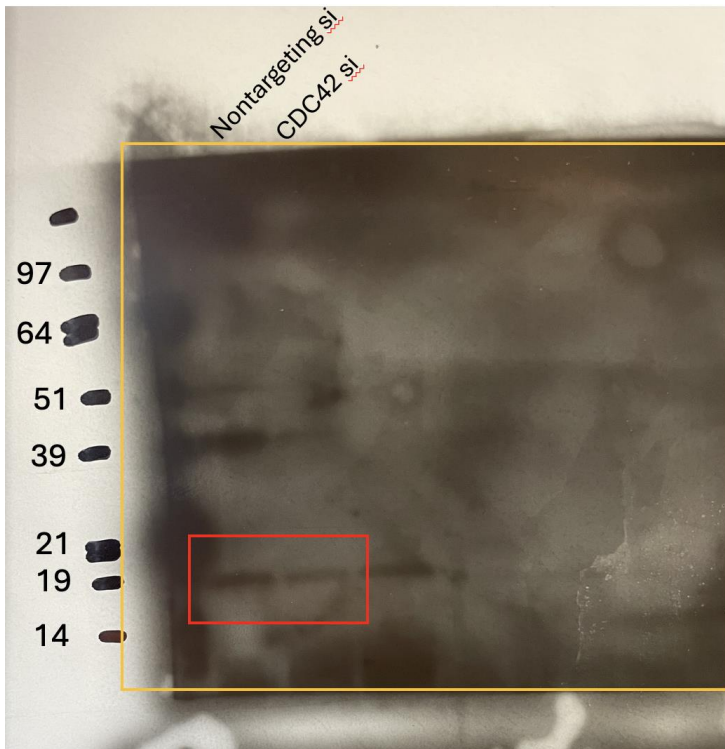

59  
60  
61 GAPDH

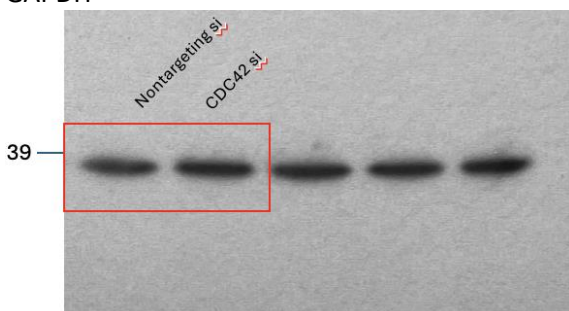

62  
63  
64
